1     **Machine learning based detection of genetic and drug class variant**  
2             **impact on functionally conserved protein binding dynamics**

3

4     Gregory A. Babbitt<sup>1\*</sup>, Ernest P. Fokoue<sup>3</sup>, Joshua R. Evans<sup>1</sup>, Kyle I. Diller<sup>1,2</sup>, Lily E. Adams<sup>1</sup>

5

6             <sup>1</sup>Thomas H. Gosnell School of Life Sciences, Rochester Institute of Technology, Rochester NY, USA  
7             14623

8             <sup>2</sup>Golisano College for Computing and Information Science, Rochester NY, USA 14623

9             <sup>3</sup>Applied Statistics, Rochester Institute of Technology, Rochester NY, USA 14623

10

11             \*email address for primary correspondence: [gabsbi@rit.edu](mailto:gabsbi@rit.edu)

12

13     **Contact Information** –Gregory A. Babbitt ([gabsbi@rit.edu](mailto:gabsbi@rit.edu)).

14

15

16

17

18

19

20

21

22

23

24

25

26

## 27 Abstract

28 The application of statistical methods to comparatively framed questions about protein dynamics can  
29 potentially enable investigations of biomolecular function beyond the current sequence and structural  
30 methods in bioinformatics. However, chaotic behavior in single protein trajectories requires statistical  
31 inference be obtained from large ensembles of molecular dynamic (MD) simulations representing the  
32 comparative functional states of a given protein. Meaningful interpretation of such a complex form of  
33 big data poses serious challenges to users of MD. Here, we announce DROIDS v3.0, a molecular dynamic  
34 (MD) method + software package for comparative protein dynamics, incorporating many new features  
35 including maxDemon v1.0, a multi-method machine learning application that trains on large ensemble  
36 comparisons of concerted protein motions in opposing functional states and deploys learned  
37 classifications of these states onto newly generated protein dynamic simulations. Local canonical  
38 correlations in learning patterns generated from self-similar MD runs are used to identify regions of  
39 functionally conserved protein dynamics. Subsequent impacts of genetic and drug class variants on  
40 conserved dynamics can also be analyzed by deploying the classifiers on variant MD runs and  
41 quantifying how often these altered protein systems display the opposing functional states. Here, we  
42 present several case studies of complex changes in functional protein dynamics caused by temperature,  
43 genetic mutation, and binding interaction with nucleic acids and small molecules. We studied the impact  
44 of genetic variation on functionally conserved protein dynamics in ubiquitin and TATA binding protein  
45 and demonstrate that our learning algorithm can properly identify regions of conserved dynamics. We  
46 also report impacts to dynamics that correspond well with predicted disruptive effects of a variety of  
47 genetic mutations. In addition, we studied the impact of drug class variation on the ATP binding region  
48 of Hsp90, similarly identifying conserved dynamics and impacts that rank accordingly with how closely  
49 various Hsp90 inhibitors mimic natural ATP binding.

## 50 Keywords

51 Molecular dynamics, machine learning, molecular evolution, pharmaceuticals, genetic variation, binding  
52 interaction

## 53 Statement of significance

54 We propose a statistical method as well as offer a user-friendly graphical interfaced software pipeline  
55 for comparing simulations of the complex motions (i.e. dynamics) of proteins in different functional  
56 states. We also provide both method and software to apply artificial intelligence (i.e. machine learning  
57 methods) that enable the computer to recognize complex functional differences in protein dynamics on  
58 new simulations and report them to the user. This method can identify dynamics important for protein  
59 function, as well as to quantify how the motions of molecular variants differ from these important  
60 functional dynamic states. For the first time, this method of analysis allows the impacts of different  
61 genetic backgrounds or drug classes to be examined within the context of functional motions of the  
62 specific protein system under investigation.

63

64

65

## 66 Introduction

67 The physicist Richard Feynman is said to have once famously quipped, ‘all biology is ultimately due to  
68 the wiggling and jiggling of atoms’. Stated with more precision, Feynman’s conjecture would imply that  
69 all biological function can ultimately be understood by analyzing rapid molecular motions in  
70 biomolecular structures as they alter or shift their functional state(s). Many decades later, these  
71 functional shifts in molecular dynamics are being illuminated by structural and computational biology.  
72 Examples of functionally altered dynamics include the destabilization of inter-residue contacts, in both  
73 disease malfunction and normal signal activation, as well as the stabilization of inter-residue contacts  
74 during protein folding, the formation of larger complexes, and various other binding interactions to  
75 small molecules. And while the functional role of rapid vibrations revealed by short term molecular  
76 dynamic (MD) simulations has been debated in the past, more recent empirical and computational  
77 studies have clearly demonstrated that differences in both rapid and directed vibrations can drive longer  
78 term functional conformational change (1, 2). From a broader perspective, if Feynman’s conjecture is  
79 true, then the specific details of a given protein system’s biomolecular dynamics will represent a  
80 potentially large source of latent variability in our functional understanding of the genome; a problem  
81 largely ignored by those disciplines currently generating the vast amounts of static forms of ‘omic’ type  
82 data (i.e. DNA sequence, transcript level, and protein structure)(3). However, in the last decade,  
83 simultaneous advances in the development of graphics hardware and biomolecular force fields has  
84 elevated our ability to computationally simulate MD long enough to capture ns to  $\mu$ s timescales for  
85 moderately-sized proteins (4, 5), and finally ‘see’ some of their functionally relevant motions. And now,  
86 the application of proper statistical comparisons of ensembles of short-timed framed MD simulation can  
87 potentially enable meaningful interpretations of comparative questions about protein dynamics (6). But  
88 due to the richly complex structure of data underlying the moving images generated by MD software,  
89 functional interpretation of modern MD simulations poses a serious challenge to current users,  
90 especially with comparatively-framed questions, where large ensembles of many production runs need  
91 to be generated and subsequently analyzed. A potential solution to this problem exists with the  
92 application of machine learning to the feature extraction and classification of the dynamic differences  
93 between ensembles of MD runs. These ensembles can be designed to represent pair-wise functional  
94 states of biomolecular systems (e.g. before/after chemical mutation or binding). Therefore, the high  
95 performance accelerated computation used to generate simulated protein motions for comparison can  
96 be effectively partnered with high performance methods for optimally extracting and learning the  
97 underlying dynamic feature differences defining the different functional states of proteins. Although  
98 machine learning has recently been applied to individual MD studies for a variety of specific tasks (7–9),  
99 there is no current software platform for the general application of machine learning to comparative  
100 protein dynamics.

101 In 2018, we released DROIDS v1.2 and v2.0 (Detecting Relative Outlier Impacts from molecular  
102 Dynamic Simulation), a GPU accelerated software pipeline designed for calculating and visualizing  
103 statistical comparisons of protein dynamics drawn from large repeated ensembles of short dynamic  
104 simulations representing two protein states (6). This application allowed simple visual and statistical  
105 comparison of protein MD ensembles set up in any way the user wanted to define them. Here, we  
106 announce the release of DROIDS v3.0, which now offers multiple pipelines tailored for specific functional  
107 comparisons of systems comprised of combinations of proteins, nucleic acids, and small ligand  
108 molecules. Comparisons can include different temperatures, different protein binding states (i.e. to  
109 DNA, drugs, toxins or natural ligands), or divergent genetic/epigenetic mutant states. We also include a  
110 major new machine learning tool, maxDemon v1.0, a multi-machine learning post-processing application  
111 for DROIDS that trains on the data representing the comparatively divergent functional dynamic states,

112 and subsequently identifies functionally conserved dynamics and genetic and/or drug class binding  
113 variant effects when deployed on new MD simulations representing these variants of interest. Thus,  
114 much like James Clerk Maxwell's mythical creature (10), maxDemon derives important information from  
115 all atom resolution observation of dynamic motion. The three primary features/aims of our newly  
116 expanded software is to (A) improve user experience in comparative protein dynamics, (B) enable the  
117 local detection of functionally conserved protein dynamics, and to (C) enable the assessment of the local  
118 dynamic impacts of both genetic and drug class variants within the functional context of protein system  
119 of interest. Because the machine learning model we employ is trained on MD data representing normal  
120 functioning dynamic states of a protein, this metric of impact is highly context dependent to how a given  
121 mutation or drug impacts a specific protein. Thus, it potentially gives considerably more functional  
122 relevance to the analysis of variants when compared to more general database-derived metrics of  
123 mutational tolerance (e.g. SIFT, PolyPhen2 etc.). In Table 1, we list five primary methodological pipelines  
124 in available in DROIDS 3.0+maxDemon to address functional questions in comparative protein dynamics.  
125 In our results and discussion here, we present data on four case studies of functional protein dynamics  
126 that include feature extraction and classification of (A) a simple temperature shift in ubiquitin dynamics,  
127 (B) mutational impacts on ubiquitin binding dynamics, (C) mutation specific impacts on DNA binding of  
128 TATA binding protein, and (D) comparison of binding dynamics of drug class variants that mimic ATP  
129 binding in Hsp90.

130

## 131 Materials and Methods

### 132 ***Overview of comparative dynamics and visualization with DROIDS v3.0***

133 Our DROIDS method/software leverages several important key concepts when making comparisons  
134 between MD runs. The method utilizes structural alignment to restrict comparison of dynamics between  
135 individual homologous amino acids. The method also restricts comparison averaged over atoms  
136 common to all amino acids (i.e. backbone C, N, O and C $\alpha$ ). The method also employs statistical  
137 ensembling to make a robust comparison between protein dynamics in different functional states (6).  
138 While this is computationally intensive, it is necessary because of the inherent chaotic nature and  
139 unpredictability of single protein trajectory projections. This logic is analogous to the many storm tracks  
140 repeatedly modeled by meteorologists to gain statistical confidence in a hurricane weather forecast,  
141 where an ensemble of model runs all with slightly different initial conditions has far more predictive  
142 power than any single simulation. In DROIDS, the user can decide how large the MD ensembles need to  
143 be based upon the inherent stability of the protein under investigation. Generally, an ensemble size of  
144 200 to 300 MD runs at 0.5-1 ns will suffice for most proteins. The dynamics is summarized by calculation  
145 of root mean square fluctuations (*rmsf*) over constant time intervals represented by a constant number  
146 of image frames defined by the user (thus allowing *rmsf* values to be sampled on repeatedly on an  
147 identical and thus comparable scale). The default number of frames (*i*) in the software for a given time  
148 slice is  $n=50$  representing 0.01 ns of simulation time. The rmsf value is thus

149

$$rmsf = \frac{1}{4} \sum_{i=1}^4 \sqrt{\frac{1}{n} * \sum_{j=1}^n (v_{jx} - w_x)^2 + (v_{jy} - w_y)^2 + (v_{jz} - w_z)^2}$$

150 where  $v$  represents the set of XYZ atom coordinates for  $i$  backbone atoms (C, N, O, and C $_{\alpha}$ ) for a given  
151 amino acid residue over  $j$  time points and  $w$  represents the reference coordinate structure at the  
152 beginning of each MD production run for a given ensemble. Therefore,  $rmsf$  values as defined here  
153 represent molecular dynamics at the resolution of a single amino acid backbone segment, and the same  
154 resolution at which fine scale protein-level molecular evolution operates via amino acid replacement,  
155 insertion and deletion. The  $rmsf$  is also the most basic underlying functional quantity to extract from MD  
156 simulation as its underpins all hierarchical levels of motion (1). Two ensembles of  $rmsf$  values (a query  
157 set and a reference set) are compared to calculate average delta  $rmsf$  or  $dRMSF$ . The user can choose to  
158 see the average angstrom difference between sets of values, or more preferably the user can calculate  
159 the symmetric Kullback-Leibler divergence (i.e. relative entropy) between the two empirical statistical  
160 distributions of  $rmsf$ . The KL divergence generally provides a richer more informative view of dynamic  
161 differences with less loss of information than simple averaging. Thus  $dRMSF$  comparing  $rmsf$  values for  
162 two ensembles of size  $m$  for a given amino acid is

$$163 \quad dRMSF_{avg} = \left( \sum_{i=1}^m rmsf \right)_{query} - \left( \sum_{i=1}^m rmsf \right)_{reference}$$

164 or

$$165 \quad dRMSF_{KL} = \frac{1}{2} * \left[ \left( \sum_{i=1}^m p(rmsf_{query}) * \log \frac{p(rmsf_{query})}{p(rmsf_{reference})} \right) \right. \\ 166 \quad \left. + \left( \sum_{i=1}^m p(rmsf_{reference}) * \log \frac{p(rmsf_{reference})}{p(rmsf_{query})} \right) \right]$$

167

168 The resulting dRMSF values are color mapped to either still structures or movie images of the dynamics  
169 according to either a ‘temperature’ scale where (+) dRMSF = amplified vibration is red and (-) dRMSF =  
170 dampened vibration is blue. A ‘stoplight’ scale where (+) dRMSF is green and (-) dRMSF is red is also  
171 available. On both scales, neutral values are shaded towards white.

## 172 **Functional classification of new MD simulation with maxDemon v1.0**

173 While users can easily employ DROIDS 3.0 to examine ensemble differences between functional genetic  
174 or binding states, the application of this knowledge to new MD simulation is nearly impossible due to  
175 the inherent complexity of the moving protein behavior. Our new post-processing software, maxDemon  
176 1.0, uses machine learning to label or classify the differences learned by a previous DROIDS  
177 query/reference state comparison when subsequently applied to one or more new MD runs. The  
178 machine learning-based detection of variant impacts on functional protein dynamics presented here is  
179 outlined schematically in Figure 1. Similar to the statistics for comparative dynamics, the learning  
180 algorithms are also applied individually to each amino acid backbone’s ensemble of  $rmsf$  values. This  
181 allows for similar single residue resolution in the results. Learners are also applied within the same user  
182 defined time slices of  $rmsf$  allowing for visualization of time resolution of classification of functional  
183 dynamic behaviors as well. The learning performance is summarized by tallying the average  
184 classification over all time slices for each amino acid. Thus, an average performance of 0.5 would  
185 indicate that the learners are not finding the functional states defined by and trained by the initial

186 DROIDS comparative analysis. Canonical correlations in the positional performance plots are key in  
187 detecting sequence encoded functionally conserved dynamics regions, as well as genetic and drug class  
188 variant impacts to these functional regions as well. This is described with more formality below.

### 189 ***Machine learning training and validation***

190 The feature vectors ( $X$ ) for machine learning are collections of *rmsf* values ( $x_i$ ) labeled according  
191 to a query ( $q$ ) and reference state ( $r$ ) defined by the DROIDS MD comparison (i.e. where labels  $y_i$  are  $q =$   
192  $1$  and  $r = 0$ ).

$$193 \quad X = \{(x_i, y_i)\}_{i=1}^N$$

194 The length of the vector ( $N$ ) is defined by the length of the MD production run chosen by the user and  
195 the size of the ensemble of MD production runs taken. Thus if the user chooses an ensemble of 200 MD  
196 production runs each at a time length of 0.5 ns (= 2500 frames) and uses the default time interval of 50  
197 frames to calculate any given interval of *rmsf* then the resulting feature vector will contain 20,000 data  
198 values for training (i.e. 10,000 values each for  $q$  and  $r$ ).

199 Users create a ‘stacked model’ or meta-model containing up to seven different machine learning  
200 classification algorithms including K-nearest neighbors, naïve Bayes, linear discriminant analysis,  
201 quadratic discriminant analysis, random forest, adaptive boosting and support vector machine (with  
202 kernel options including parameter tuned linear, polynomial, laplace and radial basis functions). R  
203 packages employed here are KNN, MASS, kernlab, randomForest and ada. We restricted machine  
204 learning to ‘shallow’ learning methods due to the relatively small datasets created when resolving  
205 dynamics of protein systems to short slices of time over single amino acids and also because of the  
206 robustness of the R packages when applied sequentially over time and structural space. Therefore, we  
207 do not yet support implementation of deep learning neural networks. For methodologically robust  
208 results on small proteins, we generally recommend users select all seven available methods. As real  
209 features of dynamics should be detectable by any method of learning, the agreement of classification  
210 obtained by the creation of a stacked model utilizing different learning methods makes the learning less  
211 sensitive to methodological artifacts. Depending upon system resources, users can choose to include or  
212 omit methods from four categories of learning (i.e. instance-based = KNN, probabilistic = NB / LDA /  
213 QDA, black box = SVM, and ensemble learning = randomForest / adaboost. Users will want to use as  
214 many as their system resources can handle, however for faster processing, a minimum of three of the  
215 seven learning methods can be chosen. Currently, most methods run on single CPU cores, however, the  
216 more CPU intensive methods of random forest and adaboost algorithms are programmed to use all  
217 available CPU cores found on the system. SVM is often the slowest method for larger protein systems  
218 and can be omitted when more than 300 residues are present in the protein simulation.

219 After learners are trained on the query and reference ensembles, they are validated on a new  
220 MD run that matches the state of the reference MD runs during training. For example, when analyzing a  
221 binding interaction where the reference ensemble of training runs are conducted in the unbound  
222 protein state, a new run will be conducted in the unbound state and a line plot of the machine learning  
223 performance (i.e. precision, recall and accuracy) will be generated for all positions on the protein. It  
224 would be expected that if comparative differences in dynamics observed in the training set have a  
225 genuine relation to function(s) defined during training, they will display repeated behavior in the new  
226 reference run and be identified by the stacked learning model generating local peaks in learning

227 performance (i.e. accuracy) at functional regions (Figure 1D). Learner performance for a given machine  
228 learning method is defined as

$$229 \quad 'performance' = \frac{TP + TN}{TP + TN + FP + FN} = \frac{TP + 0}{TP + 0 + FP + 0}$$

230 Where TP, TN, FP, and FN are true positive, true negative, false positive, and false negative  
231 classifications resp. The zero value terms arise because the validation is conducted on simulation  
232 representing just the reference state of the DROIDS comparison (where  $y_i = 0$ ). Therefore, accuracy,  
233 and precision are algebraically collapsed to a single equivalent performance metric while recall is always  
234 equal to 1.

### 235 **Identifying regions of conserved dynamics**

236 Functionally conserved dynamics are defined as 'repeated or self-similar and sequence-dependent  
237 dynamics' discovered after training machine learners on the functional state ensembles derived with  
238 DROIDS. Conserved dynamics are detected via significant canonical correlations in position specific  
239 learning performance patterns after the deployment of learners on new MD simulation runs that were  
240 setup identically to the reference dynamic state defined by the MD ensemble training set. We expect  
241 that functionally conserved dynamics will be sequence encoded and therefore should display a repeated  
242 position dependent signature in our learned pattern profiles whenever MD runs are set up identically to  
243 MD upon which learners were trained. Therefore, a significant local canonical correlation (i.e. Wilk's  
244 lambda) between learning performance profiles of self-similar MD runs can be used to detect local  
245 regions of conserved protein dynamics.

246 To detect functionally conserved dynamics after training and validation, an additional new MD  
247 run matching the functional reference state is created (i.e. matching the MD validation run). The  
248 learning performance of this run is compared to the MD validation run using a canonical correlation  
249 analysis conducted using all selected learners (i.e. the stacked model) across both space and time (i.e.  
250 fluctuations backbone atoms of individual amino acids over subdivided time intervals). Any sequence  
251 dependent or 'functionally conserved' dynamics can be recognized through a significant canonical  
252 correlation in the profile of the overall learning performance along the amino acid positions for the two  
253 similar state runs. In effect, this metric defines dynamics that are functionally conserved by capturing a  
254 signal of significant self-similarity in dynamics that co-localizes to a specific part of the protein backbone.

$$255 \quad conserved_{dynamics} = significant(CC_{self})$$

256 Significantly conserved regions calculated within a user defined sliding window (default value =20  
257 residues with cutoff of  $p < 0.01$ ) can be plotted upon the positional local correlational value profile (i.e. R  
258 value) and also can be mapped to the reference structure of the protein, colored in dark gray on a light  
259 background.

### 260 **Variant impact assessment**

261 By extension, mutational impacts of genetic or drug class variants on the functionally conserved  
262 dynamics can be quantified by their effects that range significantly beyond that observed in the self-  
263 similar reference runs. Thus when canonical correlations of variants differ significantly from the self-  
264 correlation observed in functionally conserved regions, according to a bootstrap test, we can plot the

265 magnitude of impact defining how the variant's dynamics differs from the routine self-similar dynamics  
266 of the normal functioning protein. The impacts of dissimilar states caused by altered amino acid  
267 sequence or different binding partners are assessed through their local effect on the same canonical  
268 correlation identifying conserved dynamics. We introduce a metric of relative entropy relating the  
269 canonical correlations in both the self-similar and altered variant state. In essence, this is a metric of the  
270 'impact' of a given genetic or drug class variant within the context of normal functioning dynamics. For  
271 example, when trained on a natural binding interaction (e.g. DROIDS analysis comparing a DNA binding  
272 protein in its bound and unbound states), novel MD simulations with a variety of amino acid  
273 replacements can be deployed to see whether the learners can still recognize the functional dynamics in  
274 the mutant forms. In this case, functionally tolerated mutations will result in functionally conserved  
275 dynamics that do not vary outside of  $\pm 3$  standard deviation bounds of the self-similar runs, whereas  
276 functionally intolerant mutations will result in significant deviations from self-similarity of motion. An  
277 overall impact of a genetic and/or drug class binding variant on the conserved dynamic regions is  
278 calculated by

$$279 \quad \text{variant}_{\text{impact}} = CC_{\text{self}} * \log \frac{CC_{\text{variant}}}{CC_{\text{self}}}$$

280 Comparative plots of local variant impacts outside of the 3 standard deviation bound determined by the  
281 validation run are generated within a user defined sliding window. Thus, this variant impact metric is  
282 designed to identify variant regions with dynamics that potentially alter disrupt conserved dynamic  
283 features of the normal functioning protein system.

#### 284 ***Four example applications (case studies)***

285 To demonstrate the performance and utility of DROIDS 3.0 + maxDemon 1.0, we ran the following four  
286 comparative case studies using the PDB IDs mentioned below. Bound and unbound files were created by  
287 deleting binding partners in UCSF Chimera and resaving PDBs (e.g. 3t0z\_bound.pdb, 3t0z\_unbound and  
288 3t0z\_ligand). Each MD run ensemble consisted of 200 production runs at 0.5ns each explicitly solvated  
289 in a size 12 octahedral water box using TIP3P solvent model with constant temperature under an  
290 Anderson thermostat. The models were charge neutralized with both Na<sup>+</sup> and Cl<sup>-</sup> ions. The heating and  
291 equilibration runs prior to production were 0.3ns and 10ns respectively. Prior to heating 2000 steps of  
292 energy minimization were also performed. All seven available machine learning classifiers were  
293 trained on the functional MD ensembles and deployed upon new 5 ns production runs for each variant  
294 analyzed.

295 Case study 1 (figure 2) – PDB ID = 1ubq – to analyze self-stability and effect of temperature shift in  
296 ubiquitin

297 Case study 2 (figure 3)– PDB ID = 2oob – to analyze functional binding of ubiquitin to ubiquitin ligase and  
298 impacts of several tolerance pre-classified genetic variants

299 Case study 3 (figure 4) – PDB ID = 1cdw – to analyze functional binding of TATA binding protein to DNA  
300 and impacts of several genetic variants

301 Case study 4 (figure 5) – PDB ID = 3t0z – to analyze functional ATP binding in Hsp90 and subsequent  
302 impacts of six inhibitor drug variants

#### 303 ***Improvements and upgrades over previous versions***



304 To enhance the user experience and scientific utility, DROIDS v3.0 offers many new features beyond  
305 earlier major release versions 1.2 and 2.0. These are summarized below.

- 306 - New GUI organization directs users to specific comparative tasks/applications in Table 1
- 307 - A new control file builder for managing path dependencies in Linux is included
- 308 - Amber16/18 support has been beta tested and is defined via paths.ctf file
- 309 - Single or dual GPU user options are available for faster analyses
- 310 - Automated structure prep (dry and reduce) via pdb4amber is now included in the GUI. The  
311 'reduce' variable is optional allowing users to either setup their own protonation states ahead of  
312 DROIDS, or simply allow DROIDS to hydrogenate the input structures entirely.
- 313 - Program/package dependency installer script named 'DROIDSinstaller.pl' is included. It will lead  
314 users through all dependencies required after a fresh Linux build, including CUDA libraries and  
315 tools required for Nvidia GPU accelerated Amber in the Linux environment
- 316 - KL divergence (= relative entropy) definition of dFLUX is now included as an option providing a  
317 richer color mapping of dFLUX in images and movies than the simple averaging algorithm  
318 offered in earlier DROIDS versions
- 319 - Binding interaction analysis for both protein-DNA and protein-ligand systems is now offered  
320 with dedicated GUI for these comparisons. Protein-ligand system setup includes QMMM  
321 preprocessing in Antechamber and SQM.
- 322 - LeAP control files for explicit solvent runs are now presented for advanced user modifications  
323 (e.g. changing ion concentration, water model, water box dimension of volume).
- 324 - Dedicated GUI allowing genetic mutation placement (on DNA or AA) are included for setting up  
325 variants to analyze
- 326 - Self-stability and temperature shift analysis has its own dedicated GUI, allowing users to copy  
327 the input pdb file to compare MD ensembles generated on identical structures at the same of at  
328 different temperatures
- 329 - MaxDemon 1.0 - machine learning based detection of functionally conserved dynamic regions
- 330 - MaxDemon 1.0 - machine learning based impact assessment of variants (genetic, structural or  
331 binding)
- 332 - Dynamic visualization and movie rendering of machine learning classification performance
- 333 - Virtual reality and ChimeraX compatibility is also supported (additional information and  
334 download code can be found here  
335 <https://cxtoolshed.rbvi.ucsf.edu/apps/moleculardynamicsviewer>  
336 [https://github.com/kdiller713/ChimeraX\\_MolecularDynamicViewer](https://github.com/kdiller713/ChimeraX_MolecularDynamicViewer)

### 337 ***Basic implementation of DROIDS and maxDemon***

338 The first step of any DROIDS analysis is to find or create two homologous PDB file format structures that  
339 represent the query and reference functional states of the protein system under investigation. Typically,  
340 these would represent the same protein in a bound vs. unbound state, or in a mutant vs. wildtype state.  
341 If the protein is interacting with a small ligand, and additional 'ligand only' PDB file should also be  
342 created for subsequent quantum mechanical optimization and preparation by Ambergtools antechamber  
343 program. These files should be placed within the DROIDS download folder. Upon implementation via the  
344 command 'perl DROIDS.pl' launched from terminal within the DROIDS folder, the DROIDS graphical user  
345 interface (GUI) will help the user write a control file for required working path directories on their  
346 system (first use only) and then proceeds to a main GUI outlining the various types of comparisons that

347 can be generated (as detailed in Table 1) and the number of GPU available on the system. The next step  
348 is provides a user-friendly GUI to control and schedule Amber16/18 GPU-accelerated MD simulation to  
349 generate ensembles of short MD runs representing two functional protein states wanting to be  
350 compared. These functional comparisons are not limited, but would typically entail the impact of  
351 mutation (comparing dynamics before and after one or more amino acid replacements), the impact of  
352 an environmental change (comparing two states of temperature of solvent set up), or the impact of a  
353 molecular interaction (comparing bound to an unbound state). The DROIDS GUI will lead users through  
354 the building of a structural alignment file using UCSF Chimera's MatchMaker and Match-Align tools. This  
355 will be needed later by the graphics components of DROIDS to make sure that only homologous regions  
356 of structures are being compared and analyzed. In this application, where the user is primarily  
357 interested in genetic or drug class variant impacts on an interactive signaling function, the typical  
358 training ensembles generated by DROIDS for further analysis with maxDemon should represent the  
359 normal binding function of the wild-type protein and therefore the bound vs unbound comparison  
360 would typically be used. A PDB file of the bound state can be the starting point and an unbound PDB  
361 model can be saved after deleting chains in the original file. If a small molecule ligand interaction is  
362 under study and requires application of an additional force fields such as GAFF, than an additional file  
363 representing only the ligand should also be generated and saved for preparation with antechamber  
364 software prior to building the solvent models using teLeap. The GUI will pop open the .bat files that  
365 control more details of the simulation setup allowing advanced users to write more lines into the teLeap  
366 modeling prep (e.g. to alter the water box dimensions, the water model itself, or to add additional ions  
367 beyond simple charge neutralization). The user should read all warnings provided to the terminal at this  
368 stage by the Amber software. Our GUI script will also double check the sizes of the files generated at this  
369 stage and will supply a warning if teLeap failed altogether to set up the complete model system for  
370 simulation. Upon successful setup the user can launch all the MD runs from the GUI. The requested jobs  
371 are automatically scheduled to each GPU one at a time by our software. When finished, the user can  
372 easily generate rmsf data by using the GUI to setup and launch cpptraj software provided in Ambertools.  
373 Thus the total process from file preparation, MD production and post-processing for DROIDS analysis by  
374 simply working down the buttons on each GUI from top to bottom and subsequently following the  
375 directions on the main terminal. After MD simulation and post-processing, DROIDS will take users to a  
376 second GUI for generating R plots and analyses for statistically comparing the dynamics, and then to a  
377 third GIU for visualization and movie generation. We refer users to our user manual and previous  
378 publication for more details. This third GUI has buttons to optionally launch our new machine learning  
379 application maxDemon if users wish to go beyond simple comparative protein dynamics and investigate  
380 novel simulations utilizing the DROIDS MD ensembles as a training set for subsequent machine learning.

381 More detailed instructions to users are included with our DROIDS 3.0+maxDemon 1.0 user  
382 manual available in the GitHub repository.

383 **The main repository for DROIDS 3.0 and maxDemon 1.0 can be found here. Please follow the link to**  
384 **"Releases" and download the latest release as .tar.gz or .zip file**

385 <https://github.com/gbabbitt/DROIDS-3.0-comparative-protein-dynamics>

386 and DOI: 10.5281/zenodo.3358976 concurrent with this publication

387 <https://zenodo.org/record/3358976#.XURVkhKiiM>

388 We also post various videos of examples using DROIDS, video tutorials, and ongoing projects here

389 <https://www.youtube.com/channel/UCJTbGq01pBCMDQikn566Kw>

390

## 391 Results and Discussion

392 To demonstrate the variety of comparative analyses that can be addressed with the new release of  
393 DROIDS 3.0 and maxDemon 1.0, we chose four different case studies of comparative protein dynamics.  
394 These included (A) an analysis of self-stability and temperature effects in single ubiquitin structure, (B) a  
395 functional genetic variant analysis of ubiquitin and ubiquitin ligase binding interaction, (C) a functional  
396 genetic variant analysis of DNA binding in TATA binding protein, and (D) a drug class variant analysis of  
397 compounds targeting the Bergerat ATP binding region of Hsp90 heat shock protein.

### 398 ***Machine learning analysis of impacts due to simple environmental temperature shift***

399 We first ran a null comparison as a ‘sanity check’ by running a query and reference ubiquitin (11)  
400 MD at the same temperatures (both 300K) and same solvent conditions. The DROIDS analysis (Figure 2A-  
401 C) showed identical atom fluctuation profiles along the backbone and a random dFLUX profile indicative  
402 of nonsignificant differences due to small random local thermal differences in the training sets. The  
403 machine learning classification plots on new MD runs vary randomly around 0.5 reflecting the fact that  
404 the learning algorithms effectively had no features to train on (Figure 2D). As expected, no significantly  
405 conserved dynamics were identified either (Figure 2E). By contrast, a protein dynamic comparison run  
406 with a 50K temperature difference (Figure 2 F-H) shows a much higher machine learner performance  
407 upon deployment (i.e. 70-80% successful classification – Figure 2I). Because environmental temperature  
408 shifts are not expected to reflect evolutionary conserved dynamics (i.e. are not position dependent in  
409 their effect), they also subsequently do not result in significant canonical correlations in the learning  
410 profiles (Figure J). Representative time slices of the positional classifications in each of these  
411 experiments are shown in K and L resp and indicate that our machine learning is capable of extracting  
412 and identifying simple differences in dynamics due to temperature. Another interesting observation  
413 here was the slightly higher learning performance of the simpler machine learning methods QDA and  
414 LDA over others at all sites in the temperature shifted example. We interpret this to be related to the  
415 fact that underlying rmsf distributions are probably Gaussian, a critical assumption of these two models,  
416 with unequal variances caused by steric hindrances on the backbone. This would predict that QDA might  
417 outperform other learners in this situation and it appears that it does. We note that where more  
418 complex functional dynamics are concerned, the more sophisticated learning methods such as support  
419 vector machine and adaboost often perform slightly better than others. However, we also note that  
420 these performance differences are usually quite small and that all learning methods generally come to  
421 similar local conclusions about functional dynamics. We examine machine learning performance  
422 regarding more functional binding dynamics in ubiquitin.

423

### 424 ***Machine learning analysis of impacts of genetic variants on a functional protein binding interaction***

425 To examine functional dynamics in ubiquitin, we conducted a DROIDS analysis comparing its two  
426 functional states, bound and unbound to the ubiquitin associated binding (UBA) domain of ubiquitin

427 ligase (12)(Figure 3A-D). This binding domain is highly conserved among the many other proteins that  
428 interact directly with ubiquitin. The binding interaction greatly reduces the atom fluctuation in ubiquitin  
429 at 3 characteristic positions, two loop structures centered at LEU 8 and ALA 46 and a portion of beta  
430 sheet at the C terminus (Figure 3C). These three regions also drive significant differences in dynamics  
431 across the whole protein. In novel self-similar MD runs on the bound state, we successfully detect  
432 significant canonical correlations indicating conserved dynamics in these three regions with a broad  
433 expanse in conserved dynamics (Figure 3E and F) across the UBA region (Figure 3G). We tested a set of  
434 24 mutations that included sites with the most and least tolerated effects on growth rate *in vivo* in yeast  
435 according to a study by Roscoe et al. (13). In this study, nearly all mutations at E18 and G53 are tolerated  
436 while nearly all mutations at K48 and R72 are not. Ultimately, the causes of tolerance in these variants  
437 are not known, and do not necessarily invoke functional problems in dynamics. However, the impacts  
438 that we did observe in simulation were on average twice as strong in the intolerant backgrounds when  
439 compared to the mutation tolerant backgrounds. And, while we did not see large differences in the  
440 number of mutational impacts on dynamics between tolerated and non-tolerated mutant groups, the 24  
441 mutations analyzed all show a general trend of dynamic impact falling outside of most of the functional  
442 binding region (Figure 3H-K), suggesting that ubiquitin may have evolved a tertiary structure that  
443 allosterically translates dynamic impacts to less functional regions of the protein. Some interesting  
444 exceptions to this rule were demonstrated by the very large impacts of K48L, K48W and R72D, centered  
445 squarely in the functionally conserved binding regions of ubiquitin, and would obviously heavily disrupt  
446 electrostatic charge interactions there as well.

#### 447 ***Machine learning analysis of impacts of genetic variants on DNA binding interaction***

448 TATA binding protein (TBP) is a general transcription factor that binds DNA upstream in most  
449 highly regulated eukaryotic gene promoter regions (14). While relatively small, it is a mechanically  
450 dynamic protein with a C-clamp like structure that highly distorts the rigid DNA double helix by inserting  
451 four phenylalanine side-chains between base pairs. It is thought that this bending allows TBP to be more  
452 rapidly released from the TATA element, as opposed to TATA-less promoters, subsequently allowing  
453 more highly controlled regulatory responses in TATA box genes (15). Due to its obvious symmetry and  
454 ability to impart large forces during binding, we thought that it would represent a good candidate for  
455 comparison of its dynamics during its binding interaction with DNA. We conducted a DROIDS analysis  
456 comparing human TBP (16) in its functionally bound and unbound states (Figure 4A-C). TBP exhibits a  
457 characteristic large signature of dampening of atom fluctuation throughout its entire structure with  
458 most pronounced effects in two loop regions that interact with the minor groove of DNA (arrows in  
459 Figure 4A and 4C). Canonical correlations in new self-similar MD runs marking increased performance in  
460 classification were observed in these regions (Figure 4D) along with corresponding regions of conserved  
461 dynamics identified by significant Wilk's lambda (Figure 4E). Conserved dynamics from these loop areas  
462 are connected through the chains in the beta sheet region of TBP spanning the DNA major groove  
463 contact. Mutational impacts of four variants affecting the binding loop most proximal to the C terminal  
464 exhibited followed our expectation of increasing impact ordering from R192Q, R192K, R192polyD, and  
465 R192polyW (Figure 4G and 4H). The polyD and polyW mutations incorporated 5 sequential ASP or TRP  
466 residues centered at R192, both causing the loop region to become more rigid (causing increased  
467 negative dFLUX). We expected the strong functional binding affect observed across nearly all residues in  
468 this system would make it relatively highly tolerant to single amino acid substitutions, even when  
469 located in the most functional binding loop. In accordance with our expectations, we found the most

470 impactful multiple mutation (i.e. R192polyW) significantly affected the dynamics of nearly 6 times more  
471 local residues than the least impactful single substitution (i.e. R192Q).

472

### 473 ***Machine learning analysis of impacts of drug class variants targeting the ATP binding region of Hsp90***

474 In contrast to TBP, we wanted to use our method to examine a small molecule binding  
475 interaction in a protein with potentially more complex impacts on molecular dynamics. Hsp90 is a well-  
476 known chaperone protein that assists the folding of many proteins and thereby mitigating many  
477 environmental stresses in the cell. Hsp90 even capacitates the evolutionary process by allowing  
478 potential phenotypic variation exhibited under stress to be hidden from natural selection until needed in  
479 response to environmental change (17). Hsp90 contains a highly conserved N-terminal domain where  
480 ATP binding and activation occurs. The binding of ATP physically changes motions in this region creating  
481 a ‘lid’ that closed during ATP binding and open when conversion to ADP occurs. Due to the role of Hsp90  
482 in stress mitigation in most tumors, it is a common drug target for ATP inhibitors in many cancer  
483 therapies (18, 19). The amino acid residues that interact with ATP in this region are well known and the  
484 inhibitor geldanamycin is known to mimic nearly all the local ATP contacts as well (20). Other more  
485 modern inhibitors interact with the ATP binding pocket quite differently (19, 21, 22), so we thought that  
486 this system would be a good candidate for comparative analysis of drug class variants with our software.

487 We conducted a DROIDS analysis comparing the dynamics of Hsp90 chaperone, a common  
488 drug target for inhibitors in many cancer therapies, in both its ATP bound and unbound states. The  
489 binding of ATP was discovered to significantly destabilize three co-localized alpha helical regions of the  
490 protein adjacent to and extending from the ATP binding site (Figure 5A-D). MaxDemon analysis  
491 confirmed the dynamics of this region to be highly conserved in new MD runs (Figure 5D-G). We also  
492 analyzed the impacts of the six drug class variants targeting the ATP site (20, 22, 21, 23, 24), but  
493 interacting differently with residues in this region (Figure 5H). The contacts in the ATP binding site are  
494 shown in Figure 5I. While the localized patterns of impacts of the drug variants were all quite similar to  
495 ATP (Figure 5J), the drug variants that most closely mimicked the contacts of ATP (i.e. geldanamycin) had  
496 far less impact on conserved dynamics than variants that interacted very differently with the binding  
497 pocket (i.e. benzamide SNX1321 and inhibitor FJ1(Figure H-I)). We feel that this finding demonstrates not  
498 only demonstrates the potential of our method/software quite well, but it also demonstrates that while  
499 it is important to be able to target a druggable protein binding site (25), researchers should also consider  
500 how these various small molecules might alter, or fail to alter, the natural dynamics of the system. In  
501 situations where a drug might too closely mimic the dynamic effects of a natural activator like ATP, a  
502 hyperactivation response might occur in non-tumor cells leading to secondary cancer (26–28).  
503 Alternatively, other situations may require drug targeting that does not alter the natural dynamic  
504 behavior too much, potentially activating proteolytic systems in the cell. Our software allows more  
505 detailed investigations of these potential dynamic impacts of drug class variants.

### 506 ***Conclusion***

507 We provide a well demonstrated method and user-friendly software pipeline for conducting statistically  
508 sound comparative studies of large ensembles of comparative protein dynamics. The method/software  
509 also now provides machine learning based extrapolations of effects on novel MD simulations  
510 representing various functional variants of interest to the user. While there currently is at least one

511 other software allowing users to connect sequence-based evolutionary metrics to protein dynamics (29),  
512 our method/software is unique in that regions of functional conservation are identified by analyzing  
513 self-similar features of dynamics themselves rather than relying upon marrying dynamics analysis to  
514 traditional static sequence-based approaches, which do not necessarily assume that a conserved  
515 function region has a strong dynamic component. By providing a systematic way of comparing protein  
516 dynamics at single residue resolution, our method/software provides an important step beyond  
517 traditional sequence-based bioinformatics, allowing investigators to gain a much more biophysically-  
518 grounded view of functional and evolutionary change. Another advantage to our method/software is  
519 that our functional impacts (i.e. mutational tolerance) are defined solely within the context of protein  
520 dynamic system being simulated. This provides a much deeper look into protein specific function than  
521 current genomic and proteomic database methods of predicting mutational tolerance (30, 31) currently  
522 allow. As GPU technology continues to advance at a rapid pace over the next few years, our  
523 method/software may have profound potential application to the development of precision and  
524 personalized medicine, where understanding the detailed interaction between genetic and drug class  
525 variants within the context of specific protein dynamic systems will be greatly needed.

526

## 527 Supporting Material

528 The main repository for DROIDS 3.0 and maxDemon 1.0 can be found at the GitHub repository link  
529 below. Please follow the link to “Releases” and download the latest release as .tar.gz or .zip file

530 <https://github.com/gbabbitt/DROIDS-3.0-comparative-protein-dynamics>

531 We also post various videos of examples using DROIDS, video tutorials, and ongoing projects here

532 <https://www.youtube.com/channel/UCJTbGqGq01pBCMDQikn566Kw>

533 A ‘live version’ of the figures in this manuscript is also available on our YouTube channel.

534

## 535 Author Contribution

536 GAB and EPF conceived the project and method. All authors contributed to the code base. GAB and LEA  
537 worked on beta testing and debugging.

538

## 539 Acknowledgements

540 We acknowledge the lab of Dr. Andre O. Hudson for beta testing our software during its early  
541 development. We also acknowledge Dr. Daniel Wysocki (Astrophysics program- CCRG at Rochester  
542 Institute of Technology) for very helpful suggestions regarding early methodological discussions. We also  
543 acknowledge Dr. Miranda Lynch and her colleagues at the Hauptman-Woodward Medical Research  
544 Institute for many helpful comments.

545

## 546 References

- 547 1. Henzler-Wildman, K.A., M. Lei, V. Thai, S.J. Kerns, M. Karplus, and D. Kern. 2007. A hierarchy of  
548 timescales in protein dynamics is linked to enzyme catalysis. *Nature*. 450: 913–916.
- 549 2. Niessen, K.A., M. Xu, A. Paciaroni, A. Orecchini, E.H. Snell, and A.G. Markelz. 2017. Moving in the  
550 Right Direction: Protein Vibrations Steering Function. *Biophys. J.* 112: 933–942.
- 551 3. Babbitt, G.A., E.E. Coppola, M.A. Alawad, and A.O. Hudson. 2016. Can all heritable biology really be  
552 reduced to a single dimension? *Gene*. 578: 162–168.
- 553 4. Götz, A.W., M.J. Williamson, D. Xu, D. Poole, S. Le Grand, and R.C. Walker. 2012. Routine  
554 Microsecond Molecular Dynamics Simulations with AMBER on GPUs. 1. Generalized Born. *J. Chem.*  
555 *Theory Comput.* 8: 1542–1555.
- 556 5. Salomon-Ferrer, R., A.W. Götz, D. Poole, S. Le Grand, and R.C. Walker. 2013. Routine Microsecond  
557 Molecular Dynamics Simulations with AMBER on GPUs. 2. Explicit Solvent Particle Mesh Ewald. *J.*  
558 *Chem. Theory Comput.* 9: 3878–3888.
- 559 6. Babbitt, G.A., J.S. Mortensen, E.E. Coppola, L.E. Adams, and J.K. Liao. 2018. DROIDS 1.20: A GUI-  
560 Based Pipeline for GPU-Accelerated Comparative Protein Dynamics. *Biophys. J.* 114: 1009–1017.
- 561 7. Díaz, Ó., J.A.R. Dalton, and J. Giraldo. 2019. Artificial Intelligence: A Novel Approach for Drug  
562 Discovery. *Trends Pharmacol. Sci.* .
- 563 8. Plante, A., D.M. Shore, G. Morra, G. Khelashvili, and H. Weinstein. 2019. A Machine Learning  
564 Approach for the Discovery of Ligand-Specific Functional Mechanisms of GPCRs. *Mol. Basel Switz.*  
565 24.
- 566 9. Terayama, K., H. Iwata, M. Araki, Y. Okuno, and K. Tsuda. 2018. Machine learning accelerates MD-  
567 based binding pose prediction between ligands and proteins. *Bioinforma. Oxf. Engl.* 34: 770–778.
- 568 10. Maxwell, J.C. 2001. *Theory of Heat*. 9 Reprint edition. Mineola, NY: Dover Publications.
- 569 11. Vijay-Kumar, S., C.E. Bugg, and W.J. Cook. 1987. Structure of ubiquitin refined at 1.8 Å  
570 resolution. *J. Mol. Biol.* 194: 531–544.
- 571 12. Peschard, P., G. Kozlov, T. Lin, I.A. Mirza, A.M. Berghuis, S. Lipkowitz, M. Park, and K. Gehring.  
572 2007. Structural basis for ubiquitin-mediated dimerization and activation of the ubiquitin protein  
573 ligase Cbl-b. *Mol. Cell.* 27: 474–485.
- 574 13. Roscoe, B.P., K.M. Thayer, K.B. Zeldovich, D. Fushman, and D.N.A. Bolon. 2013. Analyses of the  
575 effects of all ubiquitin point mutants on yeast growth rate. *J. Mol. Biol.* 425: 1363–1377.
- 576 14. Kornberg, R.D. 2007. The molecular basis of eukaryotic transcription. *Proc. Natl. Acad. Sci. U. S.*  
577 *A.* 104: 12955–12961.
- 578 15. Tora, L., and H.T.M. Timmers. 2010. The TATA box regulates TATA-binding protein (TBP)  
579 dynamics in vivo. *Trends Biochem. Sci.* 35: 309–314.

- 580 16. Nikolov, D.B., H. Chen, E.D. Halay, A. Hoffman, R.G. Roeder, and S.K. Burley. 1996. Crystal  
581 structure of a human TATA box-binding protein/TATA element complex. *Proc. Natl. Acad. Sci. U. S.*  
582 *A.* 93: 4862–4867.
- 583 17. Rutherford, S.L., and S. Lindquist. 1998. Hsp90 as a capacitor for morphological evolution.  
584 *Nature.* 396: 336–342.
- 585 18. Neckers, L., and P. Workman. 2012. Hsp90 Molecular Chaperone Inhibitors: Are We There Yet?  
586 *Clin. Cancer Res.* 18: 64–76.
- 587 19. Yuno, A., M.-J. Lee, S. Lee, Y. Tomita, D. Rekhtman, B. Moore, and J.B. Trepel. 2018. Clinical  
588 Evaluation and Biomarker Profiling of Hsp90 Inhibitors. *Methods Mol. Biol. Clifton NJ.* 1709: 423–  
589 441.
- 590 20. Stebbins, C.E., A.A. Russo, C. Schneider, N. Rosen, F.U. Hartl, and N.P. Pavletich. 1997. Crystal  
591 structure of an Hsp90-geldanamycin complex: targeting of a protein chaperone by an antitumor  
592 agent. *Cell.* 89: 239–250.
- 593 21. Immormino, R.M., Y. Kang, G. Chiosis, and D.T. Gewirth. 2006. Structural and quantum chemical  
594 studies of 8-aryl-sulfanyl adenine class Hsp90 inhibitors. *J. Med. Chem.* 49: 4953–4960.
- 595 22. Li, J., L. Sun, C. Xu, F. Yu, H. Zhou, Y. Zhao, J. Zhang, J. Cai, C. Mao, L. Tang, Y. Xu, and J. He. 2012.  
596 Structure insights into mechanisms of ATP hydrolysis and the activation of human heat-shock  
597 protein 90. *Acta Biochim. Biophys. Sin.* 44: 300–306.
- 598 23. Fadden, P., K.H. Huang, J.M. Veal, P.M. Steed, A.F. Barabasz, B. Foley, M. Hu, J.M. Partridge, J.  
599 Rice, A. Scott, L.G. Dubois, T.A. Freed, M.A.R. Silinski, T.E. Barta, P.F. Hughes, A. Ommen, W. Ma,  
600 E.D. Smith, A.W. Spangenberg, J. Eaves, G.J. Hanson, L. Hinkley, M. Jenks, M. Lewis, J. Otto, G.J.  
601 Pronk, K. Verleysen, T.A. Haystead, and S.E. Hall. 2010. Application of chemoproteomics to drug  
602 discovery: identification of a clinical candidate targeting hsp90. *Chem. Biol.* 17: 686–694.
- 603 24. Austin, C., S.N. Pettit, S.K. Magnolo, J. Sanvoisin, W. Chen, S.P. Wood, L.D. Freeman, R.J.  
604 Pengelly, and D.E. Hughes. 2012. Fragment screening using capillary electrophoresis (CEfrag) for hit  
605 identification of heat shock protein 90 ATPase inhibitors. *J. Biomol. Screen.* 17: 868–876.
- 606 25. Vajda, S., D. Beglov, A.E. Wakefield, M. Egbert, and A. Whitty. 2018. Cryptic binding sites on  
607 proteins: definition, detection, and druggability. *Curr. Opin. Chem. Biol.* 44: 1–8.
- 608 26. Poulikakos, P.I., C. Zhang, G. Bollag, K.M. Shokat, and N. Rosen. 2010. RAF inhibitors  
609 transactivate RAF dimers and ERK signalling in cells with wild-type BRAF. *Nature.* 464: 427–430.
- 610 27. Hatzivassiliou, G., K. Song, I. Yen, B.J. Brandhuber, D.J. Anderson, R. Alvarado, M.J.C. Ludlam, D.  
611 Stokoe, S.L. Gloor, G. Vigers, T. Morales, I. Aliagas, B. Liu, S. Sideris, K.P. Hoefflich, B.S. Jaiswal, S.  
612 Seshagiri, H. Koeppen, M. Belvin, L.S. Friedman, and S. Malek. 2010. RAF inhibitors prime wild-type  
613 RAF to activate the MAPK pathway and enhance growth. *Nature.* 464: 431–435.
- 614 28. Cichowski, K., and P.A. Jänne. 2010. Drug discovery: inhibitors that activate. *Nature.* 464: 358–  
615 359.



- 616 29. Bakan, A., A. Dutta, W. Mao, Y. Liu, C. Chennubhotla, T.R. Lezon, and I. Bahar. 2014. Evol and  
 617 ProDy for bridging protein sequence evolution and structural dynamics. *Bioinformatics*. 30: 2681–  
 618 2683.
- 619 30. Kumar, P., S. Henikoff, and P.C. Ng. 2009. Predicting the effects of coding non-synonymous  
 620 variants on protein function using the SIFT algorithm. *Nat. Protoc.* 4: 1073–1081.
- 621 31. Adzhubei, I., D.M. Jordan, and S.R. Sunyaev. 2013. Predicting functional effect of human  
 622 missense mutations using PolyPhen-2. *Curr. Protoc. Hum. Genet.* Chapter 7: Unit7.20.

623 **Table 1. Common learner assisted comparative protein dynamic investigations enabled by**  
 624 **DROIDS 3.0 + maxDemon 1.0.**

| QUESTION                                                                                        | DROIDS 3.0 training comparison                                                  | Deployment of learners in maxDemon                                      | Important notes                                                                                                     |
|-------------------------------------------------------------------------------------------------|---------------------------------------------------------------------------------|-------------------------------------------------------------------------|---------------------------------------------------------------------------------------------------------------------|
| Measure dynamic tolerances of single protein to various genetic mutations                       | Two sets (ensembles) of MD on the same protein at the same temperature          | MD run on one or more genetic mutant structures                         | Isolates MD impacts of mutation(s) from natural variability in self-similar dynamics                                |
| Measure dynamic tolerances of DNA binding interaction to genetic mutation(s)                    | MD ensembles comparing both the unbound and DNA bound protein                   | MD run on one or more unbound genetic mutant structures                 | Isolates MD impacts of mutation from natural binding function of the system                                         |
| Measure dynamic tolerances of individual genetic differences to a given drug                    | MD ensembles comparing both the unbound and drug bound protein                  | MD run on one or more drug-bound genetic mutant structures              | Isolates MD impacts of mutation from novel drug binding function of the system                                      |
| Measure dynamic similarities of different drug candidates to natural ligand binding interaction | MD ensembles comparing both the unbound and ligand bound protein                | MD run on one or more drug variant bound structures                     | Isolates MD impacts of drug candidates from the natural binding function of the ligand                              |
| Measure evolution of novel dynamics in paralog genes                                            | MD ensembles comparing two ortholog proteins (i.e. same gene different species) | MD runs on one or more paralogs (i.e. duplicated genes in same species) | Isolates potential MD novelty in duplicated gene product from nonfunctional or neutral changes in different species |

626

627

628 **Figures**

629

630

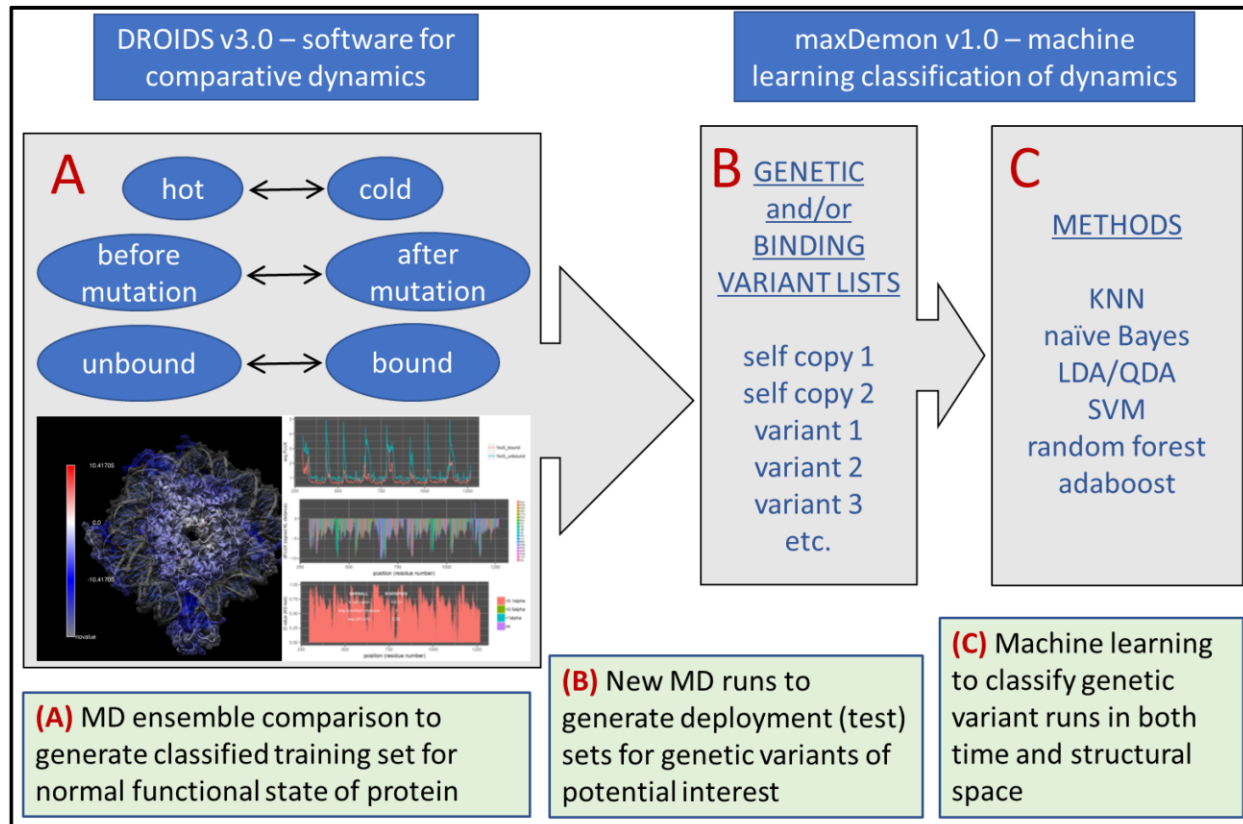

631

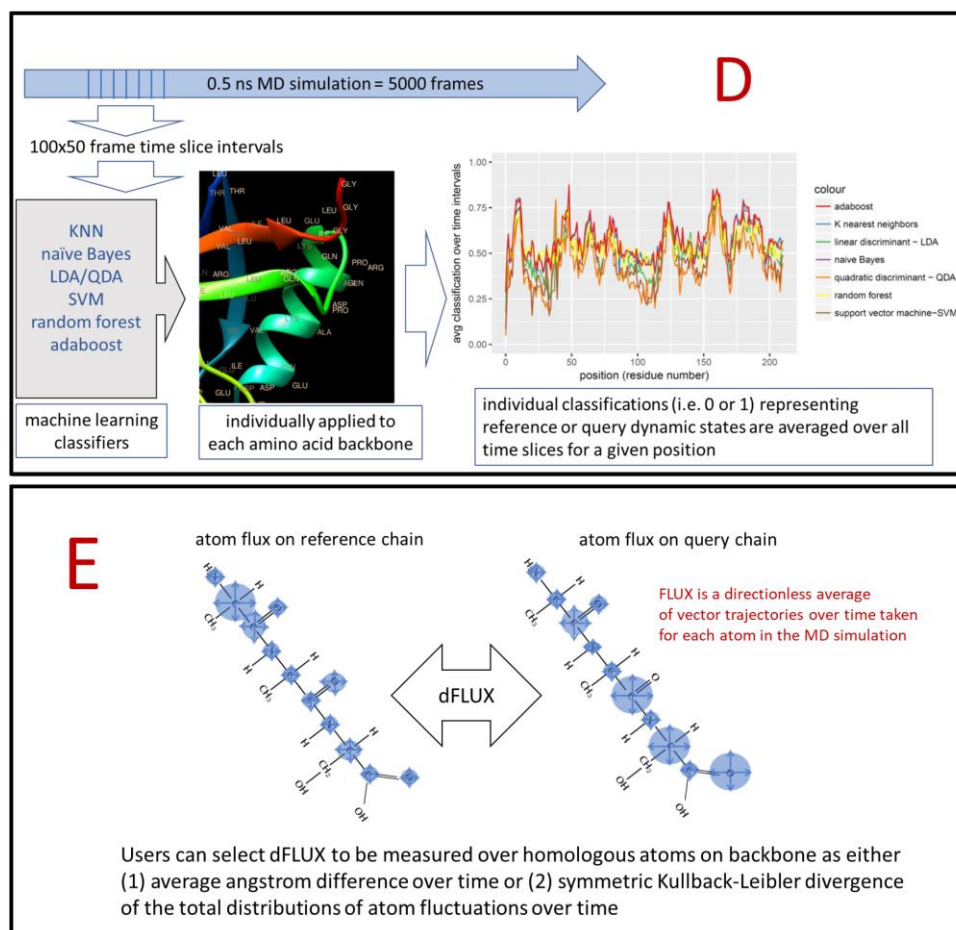

632

633 **Figure 1. Schematic overview of DROIDS 3.0 + maxDemon 1.0 software for machine learning-based**  
 634 **detection of variant impacts on functionally conserved protein dynamics.** The pipeline starts with (A)  
 635 generation of two large ensembles of molecular dynamic (MD) simulations that represent a functional  
 636 comparison of protein states (e.g. mutation, binding or environmental change). The root mean square  
 637 fluctuations (rmsf) of protein backbone atoms in these ensembles are comparatively analyzed/visualized  
 638 (i.e. using DROIDS) and are also later used as pre-classified training data sets for machine learning (i.e.  
 639 using maxDemon). Note: in the pictured DROIDS analysis of nucleosome shows overall dampening of  
 640 rmsf in the histone core with maximal dampening where the histone tails cross the DNA helix (B) New  
 641 MD simulations are generated on two structures self-similar to the query state of training as well as a  
 642 list of functional variants, and (C) up to seven machine learning methods are employed to classify the  
 643 MD in the self-similar and variant runs according to the functional comparison defined by the initial  
 644 training step. (D) The performance of learning is defined by average value of classification (i.e. 0 or 1)  
 645 over 50 frame time slices for each amino acid position and regions of functionally conserved dynamics  
 646 are later identified by significant canonical correlations in this learning efficiency (i.e. Wilk's lamda) in  
 647 self-similar MD runs. The impacts of variants are defined by relative entropy of variant MD compared to  
 648 the MD in the self-similar runs and plotted when this entropy is significantly different from the variation  
 649 in self-similarity (i.e. bootstrapped z-test). (E) A visual representation of the difference in local rmsf  
 650 (dFLUX) is typically calculated using symmetric Kullback-Leibler (KL) divergence between the two  
 651 distributions of rmsf in the training MD ensembles.

652

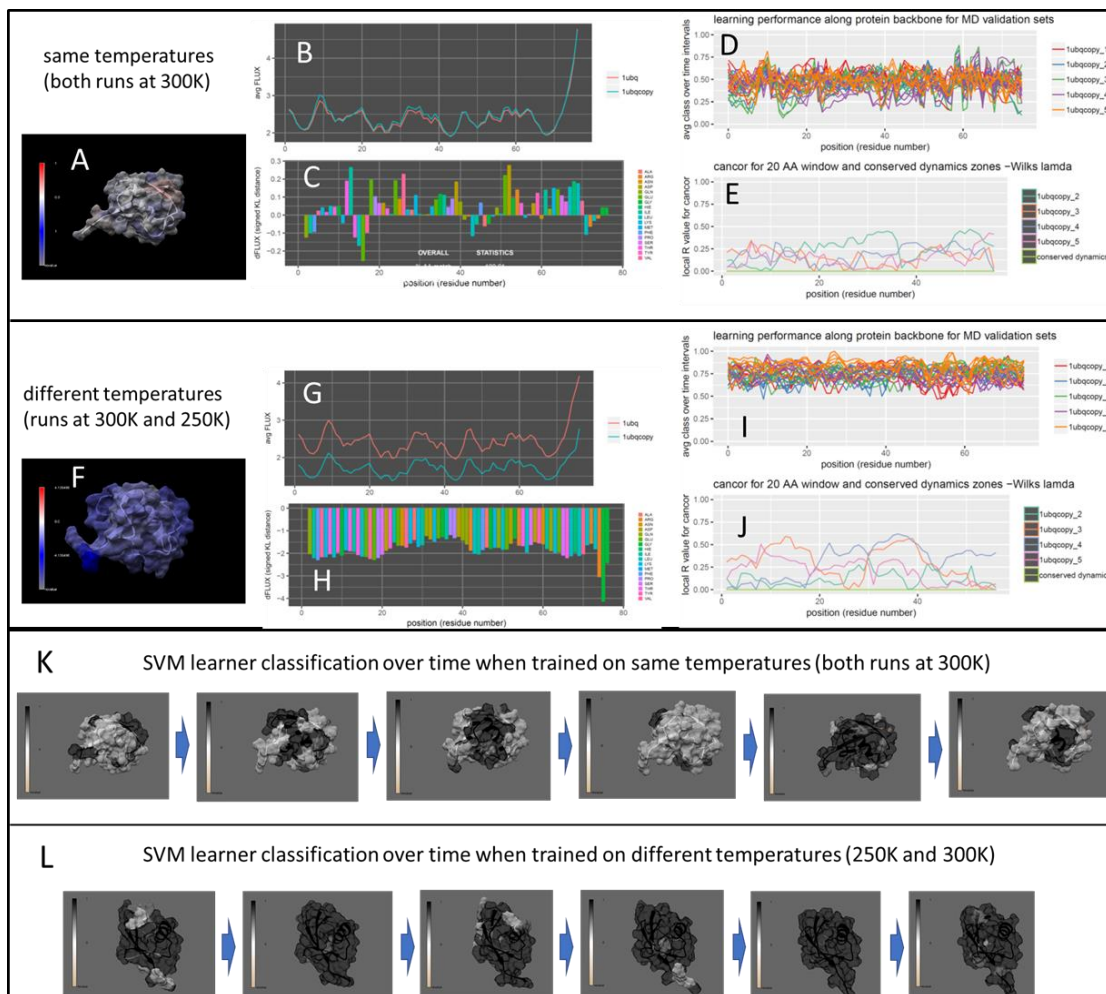

653

654 **Figure 2. Analysis of environmental temperature change on non-functional ubiquitin dynamics.**  
 655 DROIDS image and analysis of random ubiquitin dynamics compared at the same (A-E) and different (F-J)  
 656 temperatures. Note: blue color quantifies damped rmsf at temperature lowered by 50K. Note that  
 657 performance is much higher when a temperature difference is modeled (D and I resp), however, as  
 658 expected, neither comparison offers the machine learners a sequence-dependent profile by which to  
 659 establish a signal of conserved dynamics (E or J). The learner classifications for the best performing  
 660 learner in this case (quadratic discriminant function: QDA) is shown imaged on the ubiquitin structure  
 661 over time in both the (K) random dynamics and (L) temperature dampened dynamics. (Movies of this  
 662 can be observed in supplemental file A)

663

664

665

666

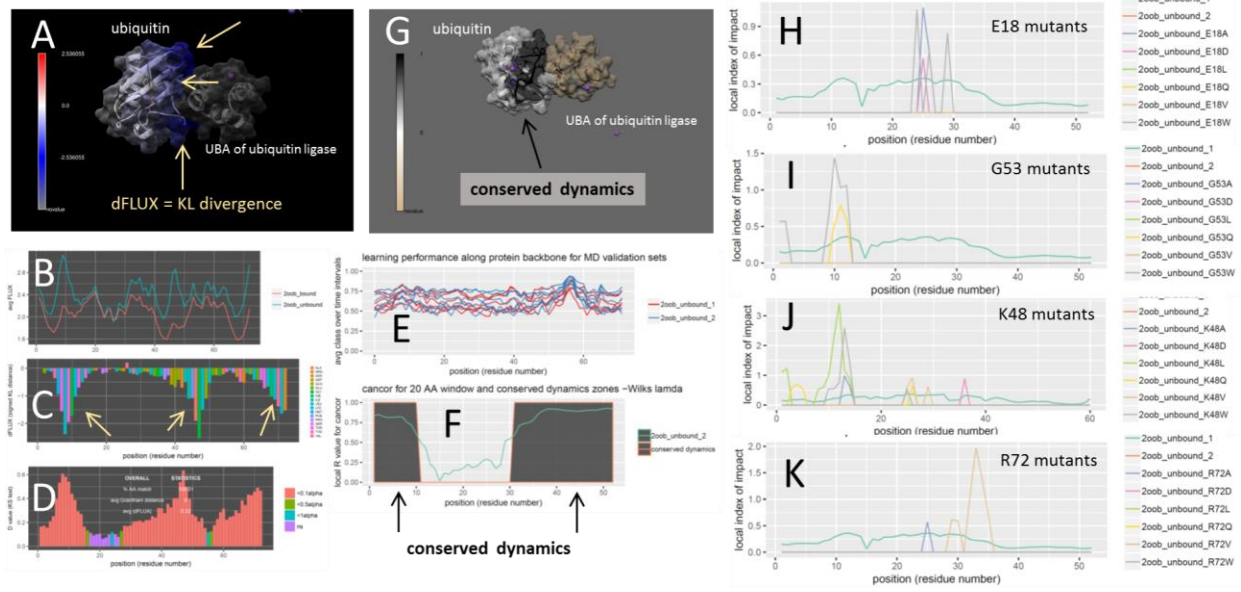

667

668 **Figure 3. Analysis of mutational impact and tolerance on functional ubiquitin dynamics.** (A) DROIDS  
 669 image and analysis of ubiquitin bound to the ubiquitin associated binding domain (UBA) of ubiquitin  
 670 ligase. Note: blue color quantifies damped rmsf at binding interface. (i.e. negative dFLUX) also by the (B)  
 671 respective rmsf profiles of bound and unbound training states and (C) the KL divergence or dFLUX profile  
 672 colored by residue. Arrows indicate most prominent dampening of rmsf near loops at THR 9, ALA 46 and  
 673 C terminus. (D) Significant differences in these rmsf profiles is determined by multiple-test corrected  
 674 two sample KS test. (E) Local learning performance of each machine learning method in self-similar  
 675 testing runs are shown color-coded by run and regions of functionally conserved dynamics, determined  
 676 via significant local canonical correlation are shown in dark gray in both (F) traditional N to C terminal  
 677 plot as well as (G) structural image. The mutational impacts of 24 genetic variants (H-K: six variants at  
 678 each or four sites) are shown all demonstrating lack of impact in functionally conserved regions of the  
 679 binding interaction.

680

681

682

683

684

685

686

687

688

689

690

691

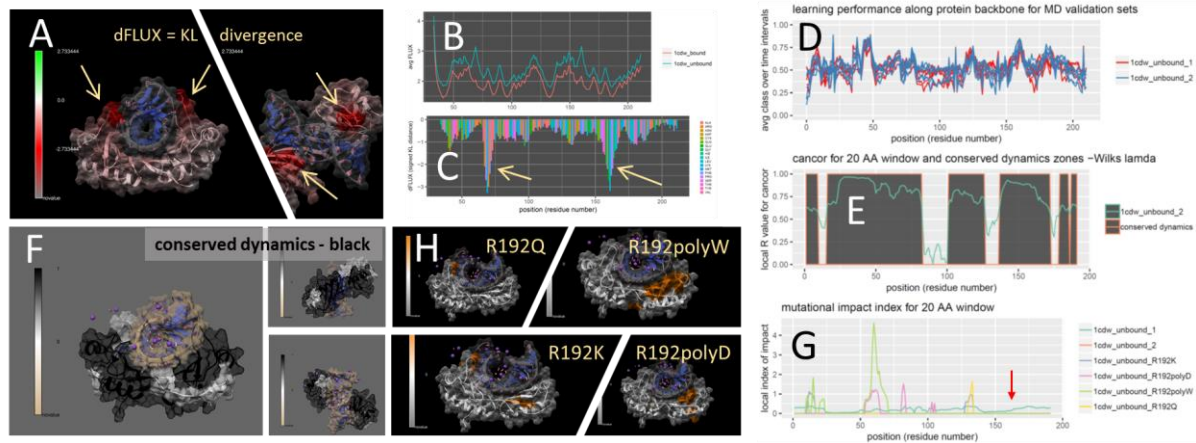

692

693 **Figure 4. Analysis of mutational impact and tolerance on DNA binding in Tata Binding Protein (TBP).**  
694 DRUIDS image and analysis of TBP in DNA-bound and unbound states showing (A) colored TBP structure,  
695 (B) respective rmsf profiles and (C) KL divergence (dFLUX) plot. Note: arrows indicate functional binding  
696 loops in the DNA minor groove red color indicates dampened rmsf. maxDemon analysis (D-E) identifying  
697 conserved dynamics supporting both minor groove binding loops and (F) connecting them through the  
698 central region of the beta sheet in the main body of TBP closest to the DNA. Mutational impacts of 4  
699 genetic variants with increasing impact one of the functional loops are also shown (G) plotted and (H) on  
700 the TBP structure. They are R192K, R192D, R192Q and polyW centered at R192 in 1cdw.pdb and and  
701 position 161 (red arrow) in plots (Note: 31 position offset is due to DNA in the original file).

702

703

704

705

706

707

708

709

710

711

712

713

714

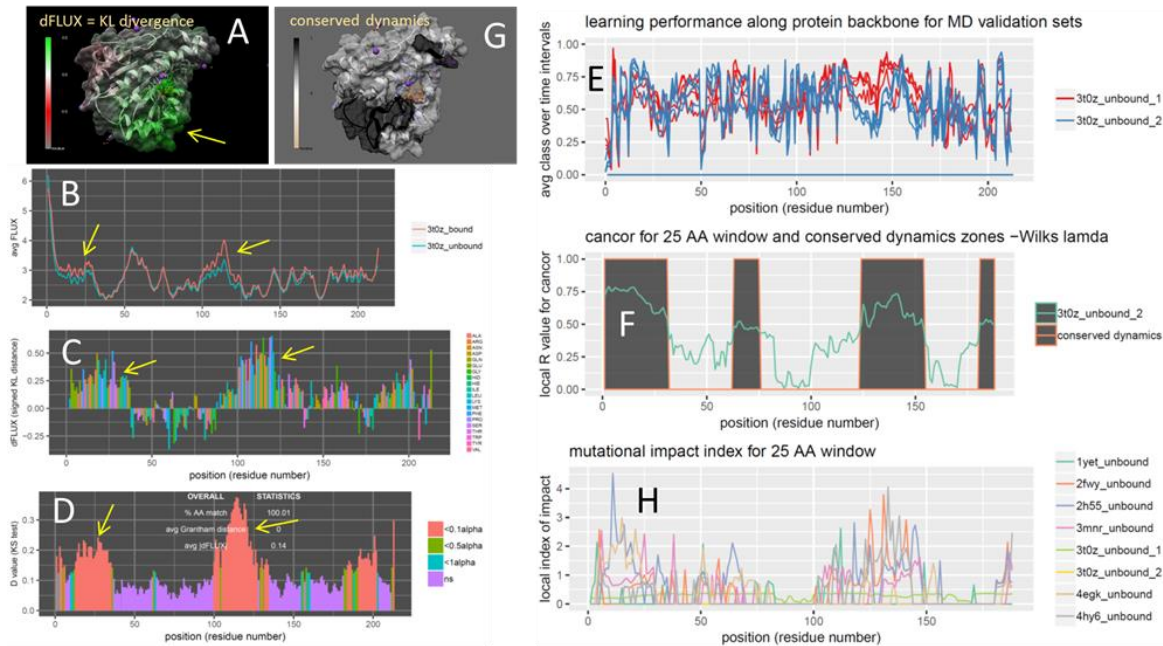

**I** Ligand contacts of drug binding variants on protein dynamics of Hsp90 in the ATP binding pocket

| ligand             | PDB  | % sim | Val 186 | Thr 184 | Trp 162 | Tyr 139 | Phe 138 | Lys 112 | Ala 111 | Leu 107 | Asn 106 | Asp 102 | Met 98 | Gly 97 | Ile 96 | Asp 93 | Lys 58 | Ala 55 | Asp 54 | Asn 51 |
|--------------------|------|-------|---------|---------|---------|---------|---------|---------|---------|---------|---------|---------|--------|--------|--------|--------|--------|--------|--------|--------|
| ATP                | 3t0z | 100   |         | x       |         |         | x       |         |         |         | x       |         | x      | x      | x      |        | x      |        |        | x      |
| Geldana mycin      | 1yet | 87.5  |         | x       |         |         | x       | x       |         |         | x       |         |        | x      |        | x      |        | x      |        | x      |
| Inhibitor PU-H64   | 2fwy | 75    |         | x       | x       |         | x       |         |         | x       |         |         | x      |        |        | x      |        | x      |        | x      |
| Inhibitor PU-DZ8   | 2h55 | 75    |         | x       | x       |         | x       |         |         | x       |         |         | x      |        | x      | x      | x      | x      |        | x      |
| Radicalol          | 4egk | 62.5  | x       | x       |         |         | x       |         |         | x       |         |         |        |        |        | x      | x      | x      | x      | x      |
| Benzamide SNX-1321 | 3mnr | 37.5  |         | x       | x       | x       |         |         |         | x       |         | x       |        |        | x      | x      | x      | x      |        |        |
| Inhibitor FJ1      | 4hy6 | 0     |         |         | x       | x       |         |         | x       |         |         |         |        |        |        |        |        |        |        |        |

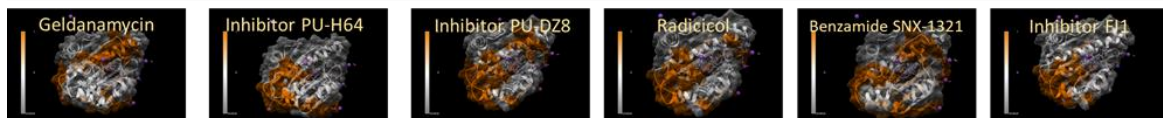

**J** Impacts of drug binding variants on protein dynamics of Hsp90 that are significantly different than binding to ATP

715

716 **Figure 5. Analysis of drug class variant binding in the ATP-binding domain of Hsp90.** DROIDS image  
 717 and analysis of Hsp90 in ATP-bound and unbound states showing (A) colored Hsp90 structure, (B)  
 718 respective rmsf profiles and (C) KL divergence (dFLUX) plot and (D) significant differences in dynamics  
 719 determined via the KS test. Note: arrows and green color indicate regions where rmsf is amplified in  
 720 response to ATP binding. maxDemon analysis (E-G) identifying conserved dynamics connecting the ATP  
 721 binding pocket and region of amplified rmsf. (H) Mutational impacts of 6 drug class variants targeting  
 722 the ATP binding pocket of Hsp90 are plotted and (I) ordered by number of differences in structural  
 723 contacts within the binding pocket. (J) Mutational impacts of these variants are demonstrated to  
 724 predominantly impact the functionally conserved region of amplified rmsf thus mimicking the dynamic  
 725 effect of functional ATP binding.

726

DROIDS v3.0 – software for comparative dynamics

maxDemon v1.0 – machine learning classification of dynamics

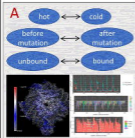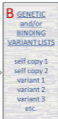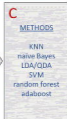

**(A)** MD ensemble comparison to generate classified training set for normal functional state of protein

**(B)** New MD runs to generate deployment (test) sets for genetic variants of potential interest

**(C)** Machine learning to classify genetic variant runs in both time and structural space





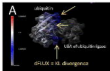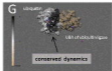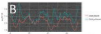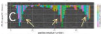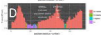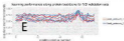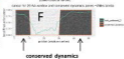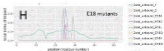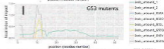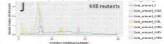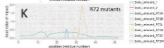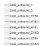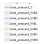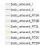

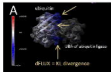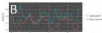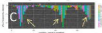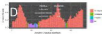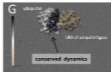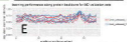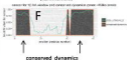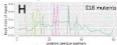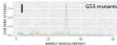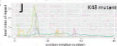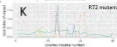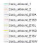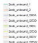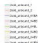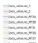

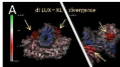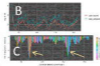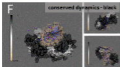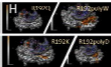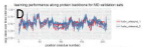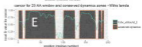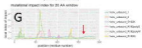

Source: https://www.biorxiv.org/content/10.1101/724211v5.full.pdf
